# Supplementary material
Source: PubMed Central journal article supplement (PMC7442604)

Figure S1

A.

### UW PDXs

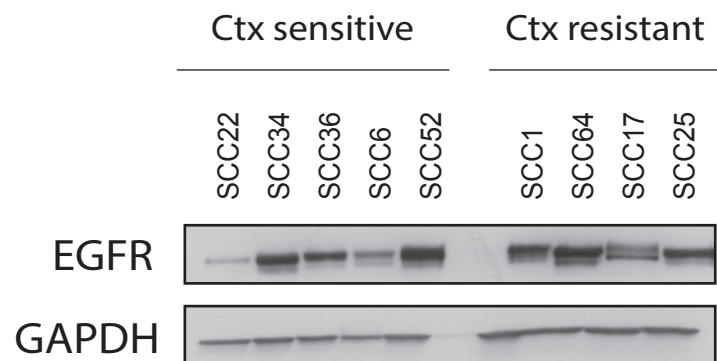

B.

### Tumor Doubling Time (days)

| PDX      | IgG         | Ctx         | p-value |
|----------|-------------|-------------|---------|
| UW-SCC1  | 13.8 ± 2.8  | 12.8 ± 1.4  | 0.376   |
| UW-SCC22 | 22.0 ± 11.5 | 97.6 ± 14.0 | 0.003   |

C.

### UW-SCC1 (Cetuximab resistant PDX)

IgG

Cetuximab

Ki67

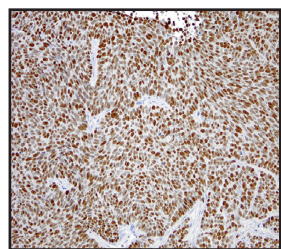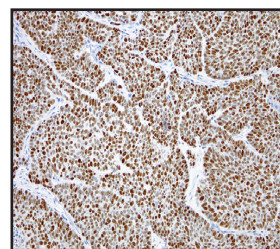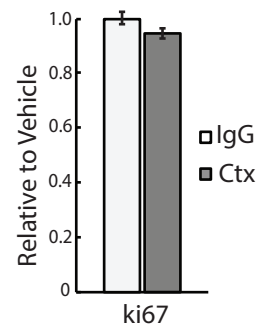

### UW-SCC22 (Cetuximab sensitive PDX)

IgG

Cetuximab

Ki67

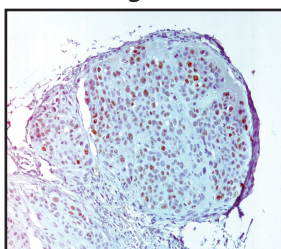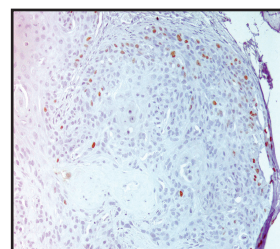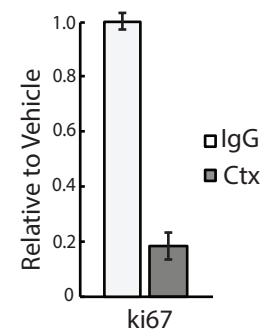

D.

### UM-SCC2 (Cetuximab resistant)

IgG

Cetuximab

Ki67

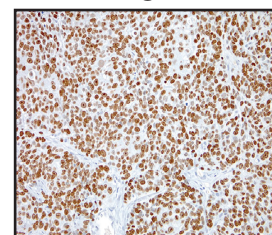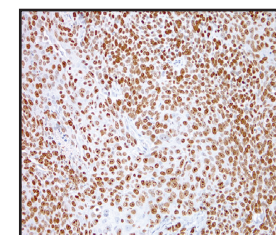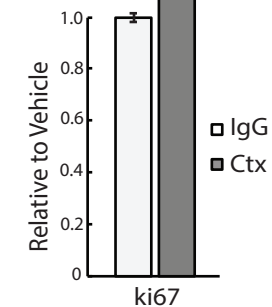

### UM-SCC47 (Cetuximab sensitive)

IgG

Cetuximab

Ki67

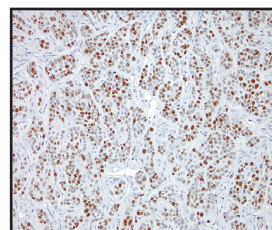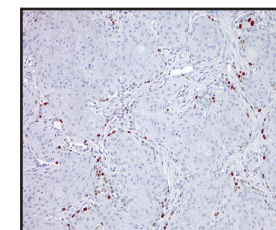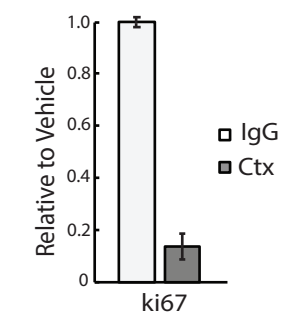

Supplement: NIHMS1596993-supplement-2.pdf [file NIHMS1596993-supplement-2.pdf]
