# Supplementary material
Source: PubMed Central journal article supplement (PMC7442604)
Supplement: NIHMS1596993-supplement-4.pdf [file NIHMS1596993-supplement-4.pdf]

Figure S3

A.

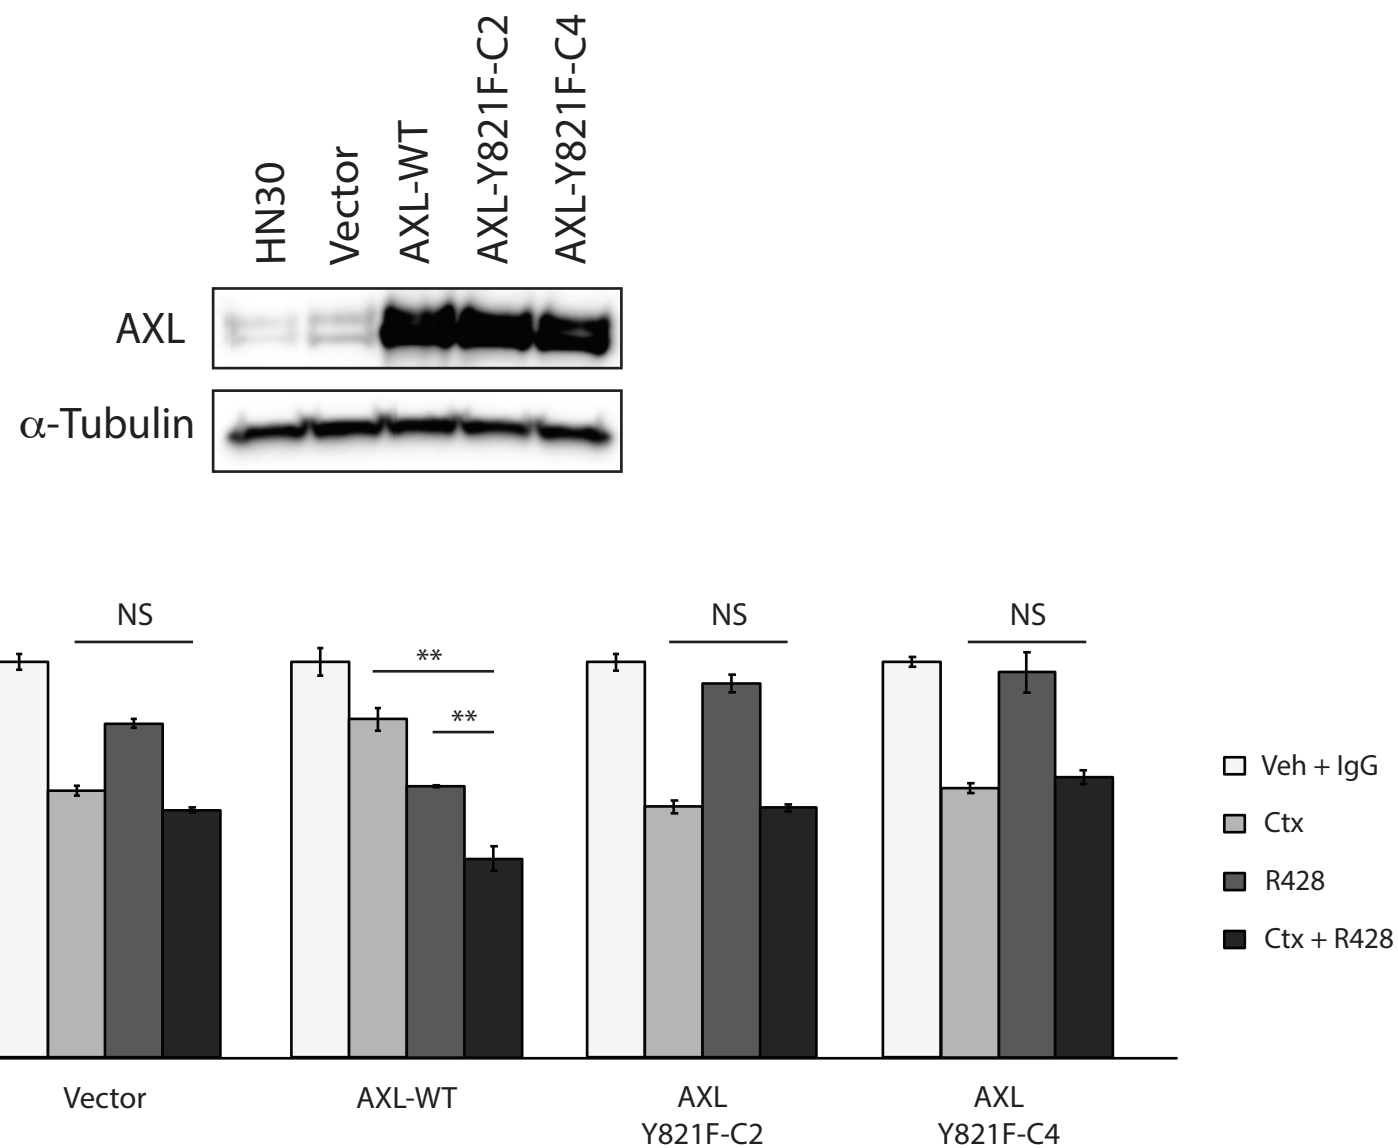

B.

| R428 and Cetuximab | HN30 | Vector | AXL-WT | AXL Y821F-C2 | AXL Y821F-C4 |
|--------------------|------|--------|--------|--------------|--------------|
| Expected           | 0.60 | 0.57   | 0.59   | 0.60         | 0.66         |
| Observed           | 0.60 | 0.62   | 0.50   | 0.63         | 0.71         |
| Ratio (O : E)      | 1.00 | 1.10   | 0.86   | 1.05         | 1.07         |
| Synergy            | NO   | NO     | YES    | NO           | NO           |
