# Supplementary material
Source: PubMed Central journal article supplement (PMC7442604)
Supplement: NIHMS1596993-supplement-7.pdf [file NIHMS1596993-supplement-7.pdf]

Figure S6

A.

| R428 and Cetuximab | UW-SCC1 | UW-SCC64 |
|--------------------|---------|----------|
| Expected           | 0.57    | 0.88     |
| Observed           | 0.37    | 0.49     |
| Ratio (O : E)      | 0.65    | 0.55     |
| Synergy            | YES     | YES      |

B.

| Imatinib and Cetuximab | HN30-AXL | UW-SCC64 |
|------------------------|----------|----------|
| Expected               | 1.31     | 1.09     |
| Observed               | 0.05     | 0.22     |
| Ratio (O : E)          | 0.04     | 0.20     |
| Synergy                | YES      | YES      |

C.

| R428 and XRT  | UW-SCC64 |
|---------------|----------|
| Expected      | 0.60     |
| Observed      | 0.39     |
| Ratio (O : E) | 0.64     |
| Synergy       | YES      |

D.

| Imatinib and XRT | UW-SCC64 |
|------------------|----------|
| Expected         | 0.78     |
| Observed         | 0.52     |
| Ratio (O : E)    | 0.67     |
| Synergy          | YES      |
