# Supplementary material
Source: PubMed Central journal article supplement (PMC7442604)
Supplement: NIHMS1596993-supplement-8.pdf [file NIHMS1596993-supplement-8.pdf]

Table S1

|                    | UW-SCC1                | UW-SCC64            | HN30     |
|--------------------|------------------------|---------------------|----------|
| Age                | 57                     | 53                  | --       |
| Sex                | M                      | M                   | M        |
| Procedure Type     | Direct laryngoscopy    | Wide local excision | --       |
| Location of Tumor  | Base of tongue         | Floor of mouth      | Pharynx  |
| Location of Sample | Recurrent              | Primary             | Primary  |
| Clinical Stage     | T2N2bM0                | T2N0M0              | T3N0M0   |
| Differentiation    | Moderate               | Well                | --       |
| Treatment          | Cisplatin + RT (70 Gy) | No prior treatment  | --       |
| HPV status         | Positive               | Negative            | Negative |
| Tobacco (pack-yrs) | 0                      | 20                  | --       |
| Alcohol            | Occasional             | Moderate            | --       |

-- indicates information unknown
