# Supplementary material
Source: PubMed Central journal article supplement (PMC7442604)

Figure S2

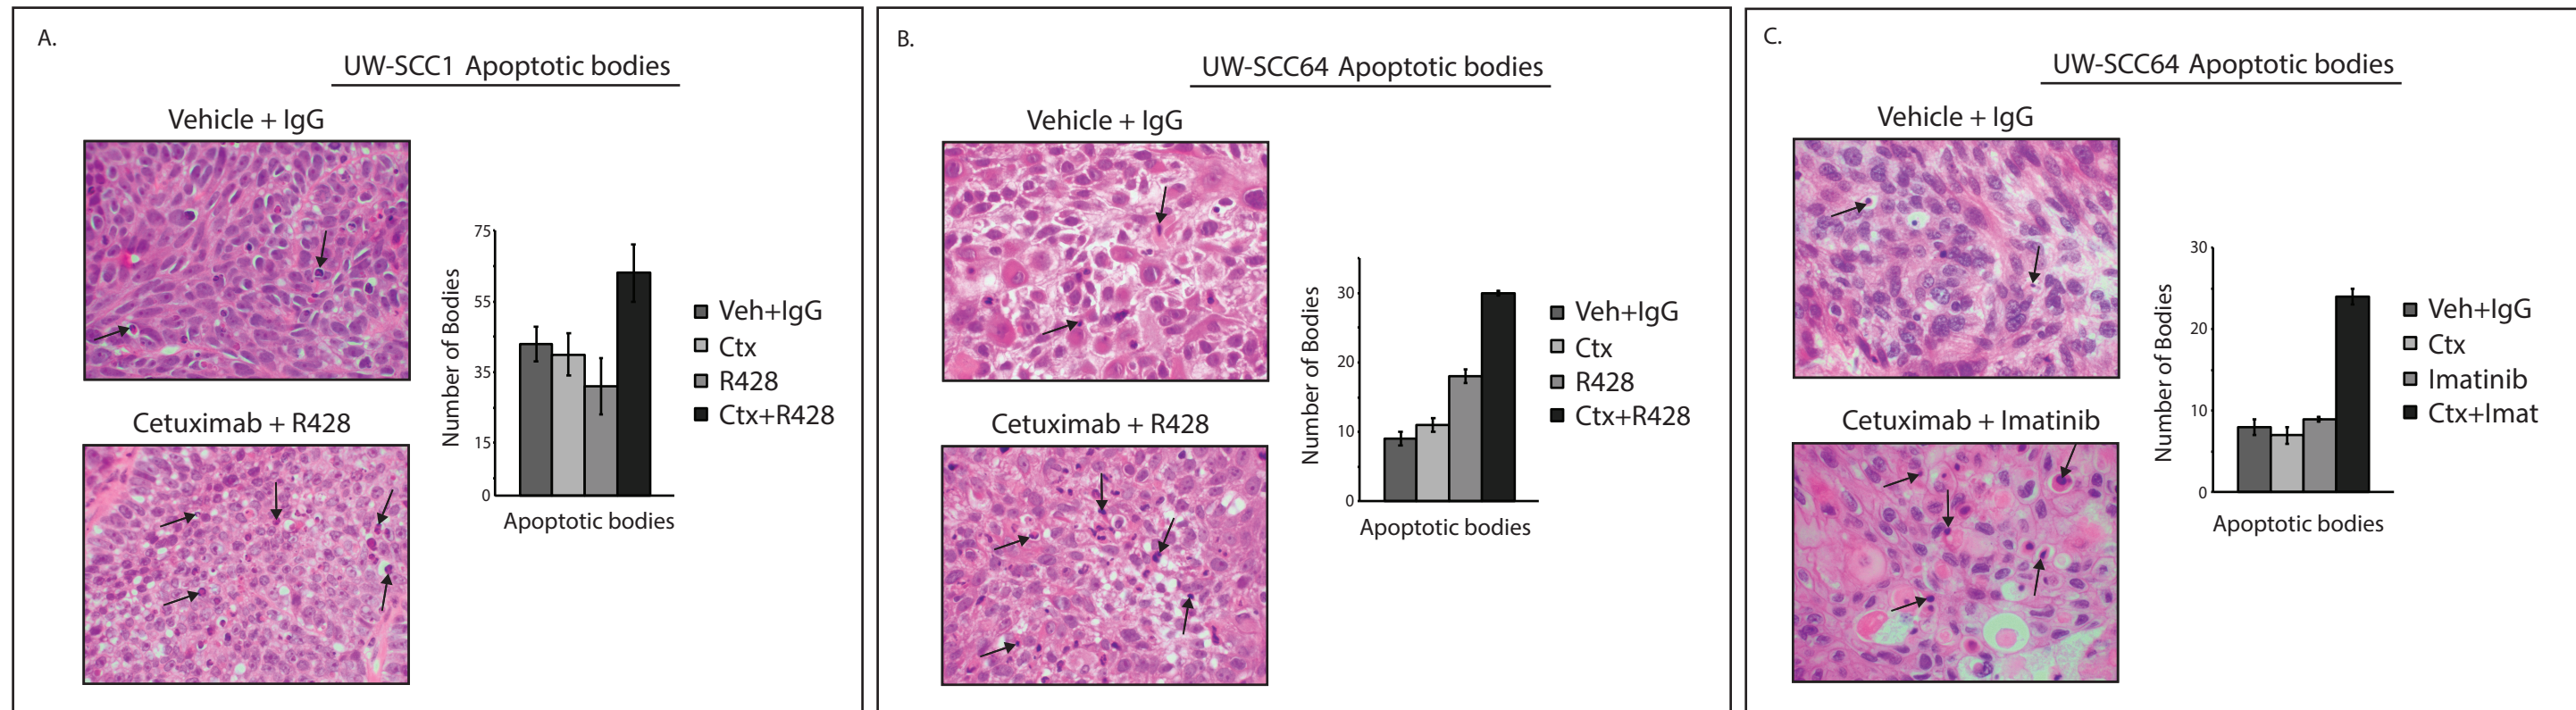

Supplement: NIHMS1596993-supplement-3.pdf [file NIHMS1596993-supplement-3.pdf]

Figure S4

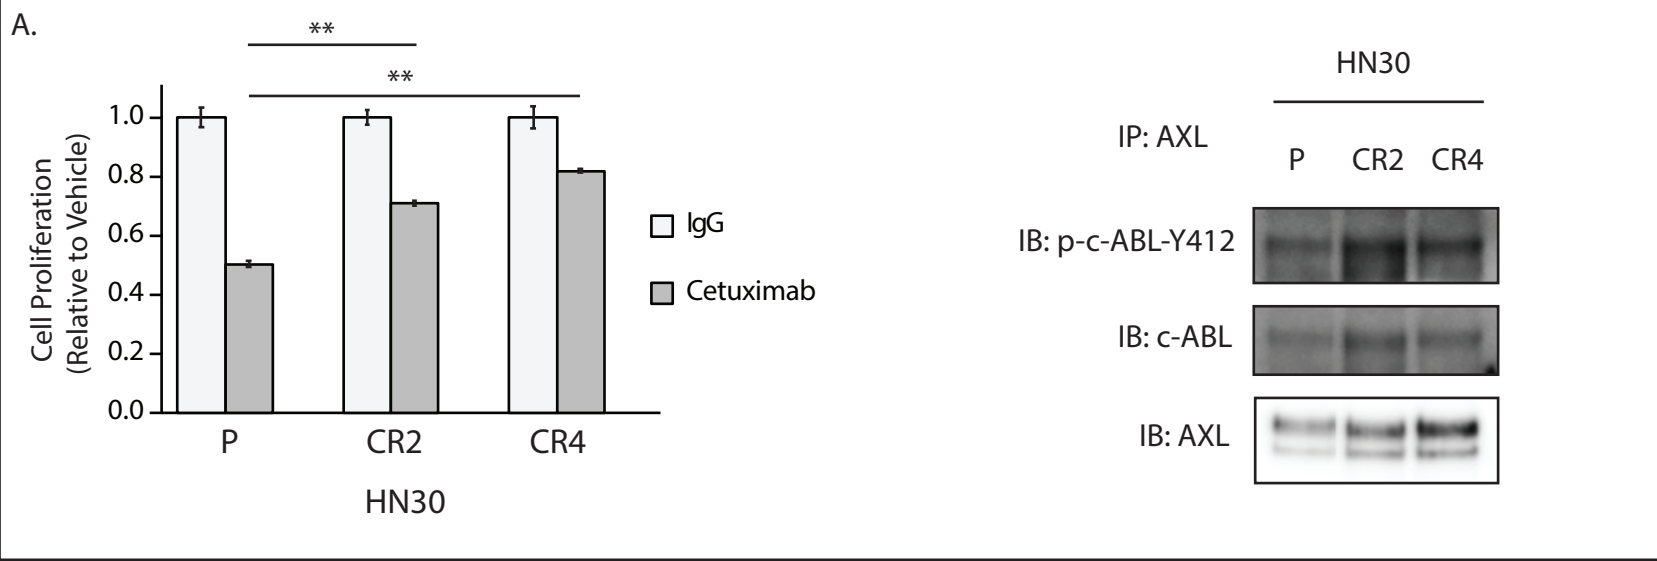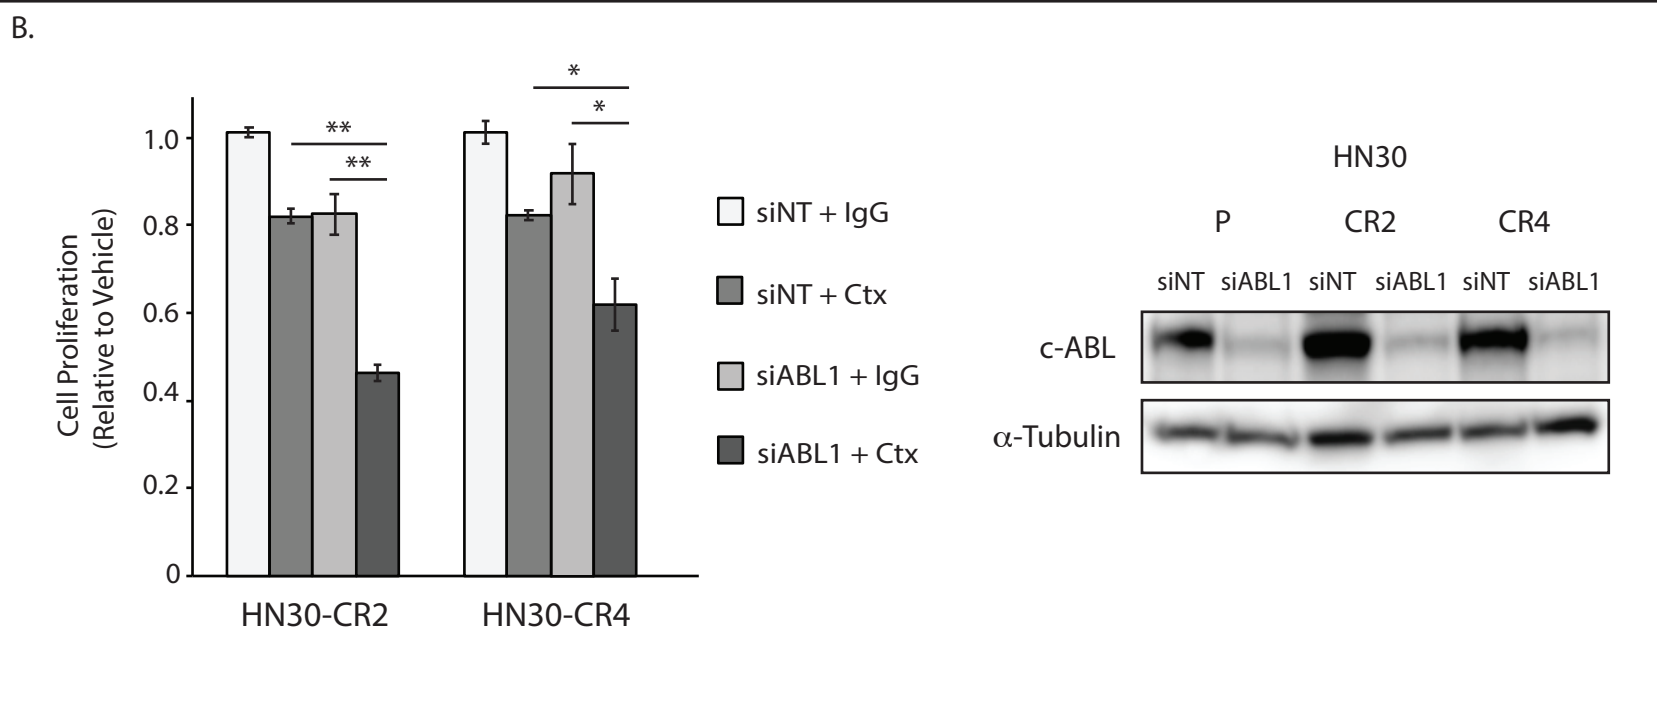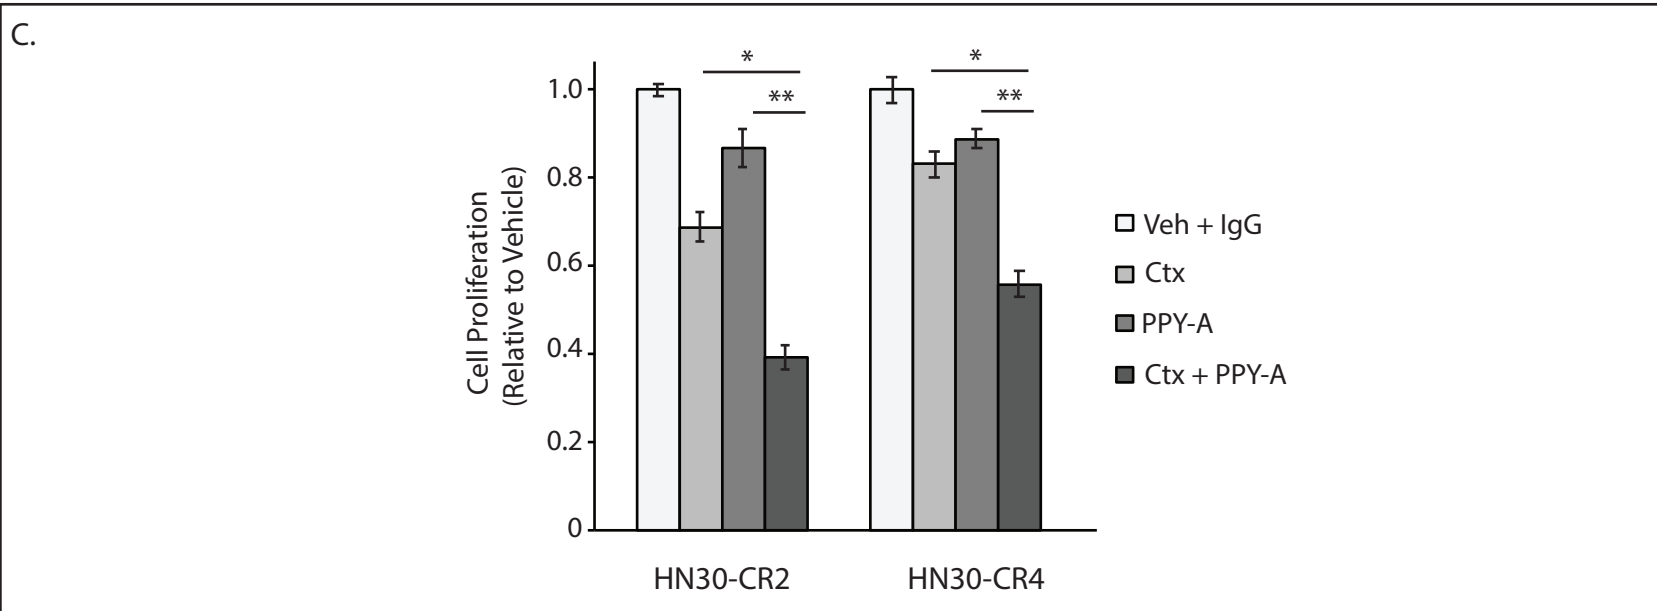

Supplement: NIHMS1596993-supplement-5.pdf [file NIHMS1596993-supplement-5.pdf]

Figure S5

A.

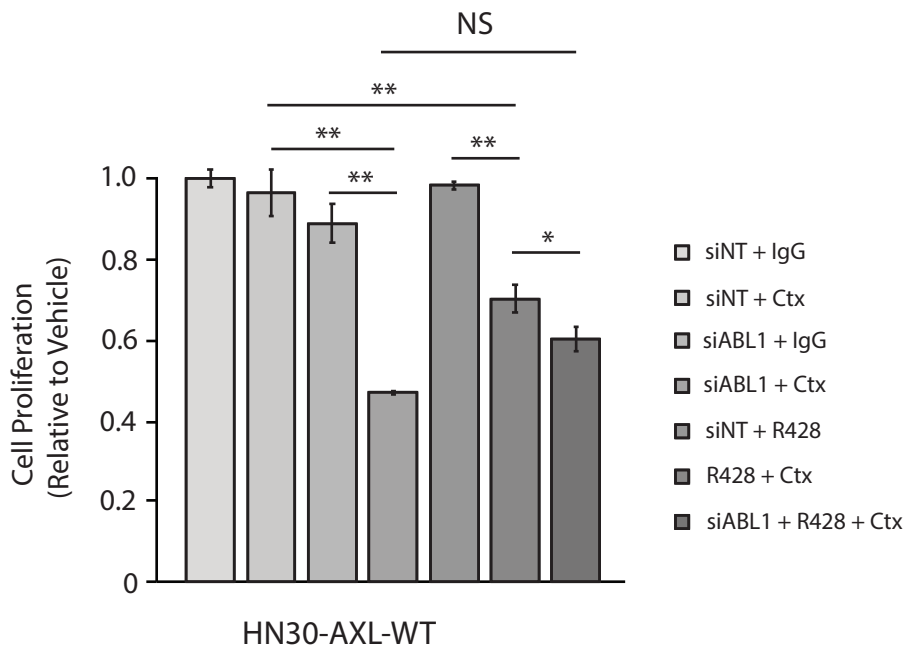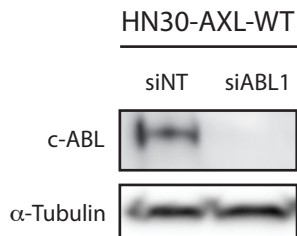

Supplement: NIHMS1596993-supplement-6.pdf [file NIHMS1596993-supplement-6.pdf]
